# Supplementary material for: Engineering cooperative tecto–RNA complexes having programmable stoichiometries
Source: PubMed Central journal article supplement — Nucleic Acids Res. 2010 Dec 7;39(7):2903–17. doi: 10.1093/nar/gkq1231 (PMC3074147; doi:10.1093/nar/gkq1231), 2010-12-07

## Supporting Information

**Title:** Engineering Cooperative Tecto-RNA Complexes Having Programmable Stoichiometries

**Authors:** Irina V. Novikova<sup>1</sup>, Bachar H. Hassan<sup>1§</sup>, Marina Mirzoyan<sup>1</sup>, Neocles B. Leontis<sup>1,2\*</sup>

<sup>1</sup> Department of Chemistry and Center for Photochemical Sciences, Bowling Green State University, Bowling Green, Ohio 43403

<sup>2</sup> Center for Biomolecular Sciences, Bowling Green, State University, Bowling Green, Ohio 43403

**§Present address:** Department of Biochemistry, University of Illinois at Urbana-Champaign, Urbana, IL 61801

**\*To whom correspondence should be addressed.** Neocles B. Leontis, phone: 1-419-372-8663; fax: 1-419-372-9809; email: [leontis@bgsu.edu](mailto:leontis@bgsu.edu) or [nleontis@nsf.gov](mailto:nleontis@nsf.gov)

## Supplemental Material S-1. List of RNA sequences used in the study.

### Sequences used for homo-assembly:

1c (8/3//6/5):gggauaugguaccaccugaccugugugcuucggcaaucggcaaccgggggaacuugguacggggaaacucgugguaccuaaguccuu  
1b (7/4//6/5):gggauaugguaccaccugaccugugugcuucggcaaucgggucaaccgggggaacuugguacggggaaacucgugguaccuaaguccuu  
1a (6/5//6/5):gggauaugguaccaccugaccugugugcuucggcaaucgggucaaccgggggaacuugguacggggaaacucgugguaccuaaguccuu  
8 (5/6//6/5):gggauaugguaccaccugaccugugugcuucggcaaucgggagucaaccgggggaacuugguacggggaaacucgugguaccuaaguccuu  
2a (5/6//5/6):gggauaugguaccaccugaccugugugcuucggcaaucgggagucaaccgggggaacuugguacggggaaacucgugguaccuaaguccuu  
2b(5/6//4/7):gggauaugguaccaccugaccugugugcuucggcaaucgggagucaaccgggaacggguacggcgggaaacucgugguaccuaaguccuu  
2c (5/6//3/8):gggauaugguaccaccugaccugugugcuucggcaaucgggagucaaccgggaacggguacggcgggaaacucgugguaccuaaguccuu  
2d (5/6//2/9):gggauaugguaccaccugaccugugugcuucggcaaucgggagucaaccgggaacggcgggaaacucgugguaccuaaguccuu  
3a (7/4//5/6):gggauaugguaccaccugaccugugugcuucggcaaucgggucaaccggggaaacucgugguaccuaaguccuu  
3 (6/5//5/6):gggauaugguaccaccugaccugugugcuucggcaaucgggucaaccggggaaacucgugguaccuaaguccuu  
3b (6/5//4/7):gggauaugguaccaccugaccugugugcuucggcaaucgggucaaccgggaacggguacggcgggaaacucgugguaccuaaguccuu  
3c (6/5//3/8):gggauaugguaccaccugaccugugugcuucggcaaucgggucaaccgggaacggguacggcgggaaacucgugguaccuaaguccuu  
4 (7/4//4/7): gggauaugguaccaccugaccugugugcuucggcaaucgggucaaccgggaacggguacggcgggaaacucgugguaccuaaguccuu

### Sequences used for hetero-assembly:

1bDA:gggauaugguaccaccugaccugugugcuucggcaaucgggucaaccgggguaacuugguacggggaaacucgugguaccuaaguccuu  
1bDB:gggaaucugguaccaccugaccugugugcuucggcaaacggcguaaccgggggaacuugguacggggaaacucgugguaccuguguccuu  
8TA: gggauaugguaccaccugaccugugugcuucggcaaucgggagucaaccgggguaacuugguacggggaaacucgugguaccuaaguccuu  
8TB: gggaaucugguaccugaccugugugcuucggcaaacggcgagucaaccggggaaacuugguacggggaacucgugguaccuguguccuu  
8TC:gggaaagcguaaccugaccugugugcuucggcauauaggagucaaccggggaaacuugguacgggaaacucgugguaccuguaucuu  
1bDBmut: gggaaucugguaccaccugaaagcgggcuucggccgcuacuuaacgggggaacuugguacggggaaacucgugguaccuguguccuu  
8TBmut: gggcgcuacuuaaccugaccugugugcuucggcauauaggagucaaccgggggaacuugguacggggaaacucgugguaccuguguccuu  
8TCmut:gggcgcuacuuaaccugaccugugugcuucggcauauaggagucaaccgggggaacuugguacggggaaacucgugguaccuguguccuu  
8DA/8TA/8HA: gggauaugguaccaccugaccugugugcuucggcaaucgggagucaaccgggguaacuugguacggggaaacucgugguaccuaaguccuu  
8DB: gggaaucugguaccugaccugugugcuucggcaaacggcgagucaaccgggggaacuugguacggggaacucgugguaccuguguccuu  
8TetC/8HC:gggaaagcguaaccugaccugugugcuucggcauauaggagucaaccgggcuauaggugcuucggcauauaggugguacgggggaa  
cucgugguaccuguaucuu  
8TetD/8PA: gggaaucugguaccugaccugaaagagucaaccgggggaacuugguacggggaaacucgugguaccuguguccuu  
8PB/8HD: gggaaucugguaccugaccugaaagagucaaccggggcuacuugcuucggcaaacggccuugguacggggaaacucgugguaccuguguccuu  
8PC/8HE: gggauaugguaccugaccuguaagagucaaccggggcuacuugcuucggcaaacggccuugguacggggaaacucgugguaccuaaguccuu  
8PD/8HF: gggaaucugguaccugaccuguaagagucaaccgggggaacuugguacggggaaacucgugguaccuguguccuu  
8PE: gggauaugguaccugaccugugugcuucggcaaucgggagucaaccggggaaacuugguacggggaacucgugguaccuaaguccuu  
8TB/8HB: gggaaucugguaccugaccugugugcuucggcaaacggcgagucaaccgggggaacuugguacggggaaacucgugguaccuguguccuu  
B(7): gggauaugguaccaccugaccugugugcuucggcauauaggagaccugagggaacuuaaccggggaaacuugguacgggaaacucgugguaccuaaguccuu

## Supplemental Material S-2: Determination of equilibrium constants for dimer and trimer formation.

Here, we derive the equations used to determine equilibrium constants for dimer and trimer formation, treating hetero- and homo-complex formation separately.

### 1. Heterodimer formation

First, we consider association of two monomers, M1 and M2, to form a dimer D. For convenience, we write this as a dissociation process:

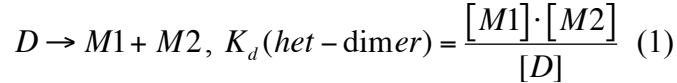

For equilibrium constant determination using gel mobility shifts, one molecule is radiolabeled and used in much lower concentration than the other. We will take M1 to be the radiolabeled molecule so that  $[M1] \ll [M2]$ . Because of this, we can assume  $[M2] \gg [D]$  and then we can take  $[M2]$  equal to the amount added to the solution. Let T to be the total concentration of M1, in monomer and dimer form:

$$T = [M1] + [D] \quad (2)$$

The dimer concentration is equal to T, the total concentration of M1, times the percentage of M1 that is in the dimer form. This can be quantified by integrating the radiolabel counts of the monomer and dimer bands on scanned gel. The total counts ( $C_T$ ) equal the sum of the counts measured for monomer ( $C_M$ ) and for dimer ( $C_D$ ). Thus, the percentage of dimer,  $r$ , is:

$$r = \frac{C_D}{C_T} = \frac{C_D}{(C_{M1} + C_D)} \quad (3)$$

We can express  $[D]$  in terms of T and  $r$ :

$$[D] = T \cdot \frac{C_D}{(C_{M1} + C_D)} = T \cdot r \quad (4)$$

Finally, we can express  $K_d$  (het-dimer) in terms of T,  $[M2]$  and  $r$ :

Thus,

$$K_d(\text{het-dimer}) = \frac{[M1] \cdot [M2]}{[D]} = \frac{(T - [D]) \cdot [M2]}{[D]} = \frac{(T - T \cdot r) \cdot [M2]}{T \cdot r} = \frac{(1 - r) \cdot [M2]}{r} \quad (5)$$

To find  $K_d$  (het-dimer), we carry out non-linear fitting of Eq. 5 using the experimental data for  $r$  and  $[M2]$ .

## 2. Homodimer formation

Written as a dissociation process, we have for homodimerization:

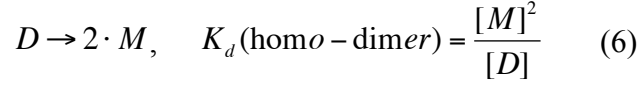

The total concentration of M is given by:

$$T = [M] + 2[D] \quad (7)$$

Typically a fixed and small amount (<0.5 nM) of radiolabeled monomer, M\* is mixed with varying amounts of unlabeled monomer M and equilibrium is determined by gel mobility shift analysis. We assume  $[M^*] \ll [M]$  and that any dimer formed contains at most one molecule of M\*. In other words, there are no significant amounts of dimer consisting of two molecules of M\* and so  $[D]$  is proportional to the measured counts of M\* in the dimer electrophoresis band. Again we have  $C_T = C_M + C_D$ . Because two monomers combine to make each dimer,  $[D]_{\max} = T/2$ . Combining these equations we can express  $[D]$  in terms of T and the measured counts,  $C_M$  and  $C_D$  or T and  $r$  where  $r$  is defined in Eq. 3

$$[D] = \frac{T}{2} \cdot \frac{C_D}{(C_M + C_D)} = \frac{T}{2} \cdot \frac{C_D}{C_T} = \frac{T}{2} \cdot r \quad (8)$$

Finally:

$$K_d(\text{homo-dimer}) = \frac{[M] \cdot [M]}{[D]} = \frac{(T - 2[D])^2}{[D]} = \frac{2 \cdot (T - T \cdot r)^2}{T \cdot r} = \frac{2 \cdot T^2 \cdot (1-r)^2}{T \cdot r} = \frac{2 \cdot T \cdot (1-r)^2}{r}, \quad (9)$$

To find  $K_d(\text{homo-dimer})$ , we carry out non-linear fitting of Eq. 9.

## 3. Homo-trimer formation

We write homo-trimer equilibrium as dissociation directly to monomer units:

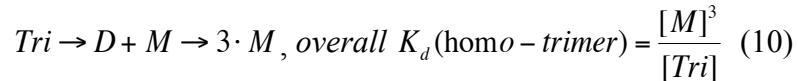

The total concentration is given:

$$T = [M] + 2[D] + 3[Tri] \quad (11)$$

For cooperatively forming homo-trimers, we do not observe any dimer band so we take  $[D]=0$  so Eq. 11 reduces to:

$$T = [M] + 3[Tri] \quad (12)$$

As for homo-dimers, we assume that the concentration of labeled M is very small compared to added non-radioactive M,  $[M^*] \ll [M]$ . Thus, each trimer contains at most one molecule of  $M^*$  and  $C_{Tri}$  is proportional to the measured counts of the monomer band. Also, the maximum concentration of trimer that can be produced is  $T/3$ . We redefine  $r$  to be the percentage of trimer:

$$r_{Tri} = \frac{C_{Tri}}{(C_M + C_{Tri})} = \frac{C_{Tri}}{C_T} \quad (13)$$

With these assumptions we have:

$$[Tri] = \frac{T}{3} \cdot r_{Tri} \quad (14)$$

Combining Eq. 10 , 12 and 14 we obtain an expression for  $K_d$  (homo-trimer) in terms of  $T$  and  $r_{Tri}$ :

$$K_d = \frac{[M]^3}{[Tri]} = \frac{(T - 3 \cdot [Tri])^3}{[Tri]} = \frac{3 \cdot (T - 3[Tri])^3}{T \cdot r_{Tri}} = \frac{3 \cdot (T - T \cdot r_{Tri})^3}{T \cdot r_{Tri}} = \frac{3 \cdot T^3 \cdot (1 - r_{Tri})^3}{T \cdot r_{Tri}} = \frac{3 \cdot [T]^2 \cdot (1 - r)^3}{r}, (15)$$

We use non-linear fitting to obtain  $K_d$  from  $T$  vs  $r$  data.

**Figure S-1.** Detailed molecular design of tecto-*RNA* units used in this work. Color-coding of *RNA* regions is consistent with their 2D diagrams in Figure 1 and 3.

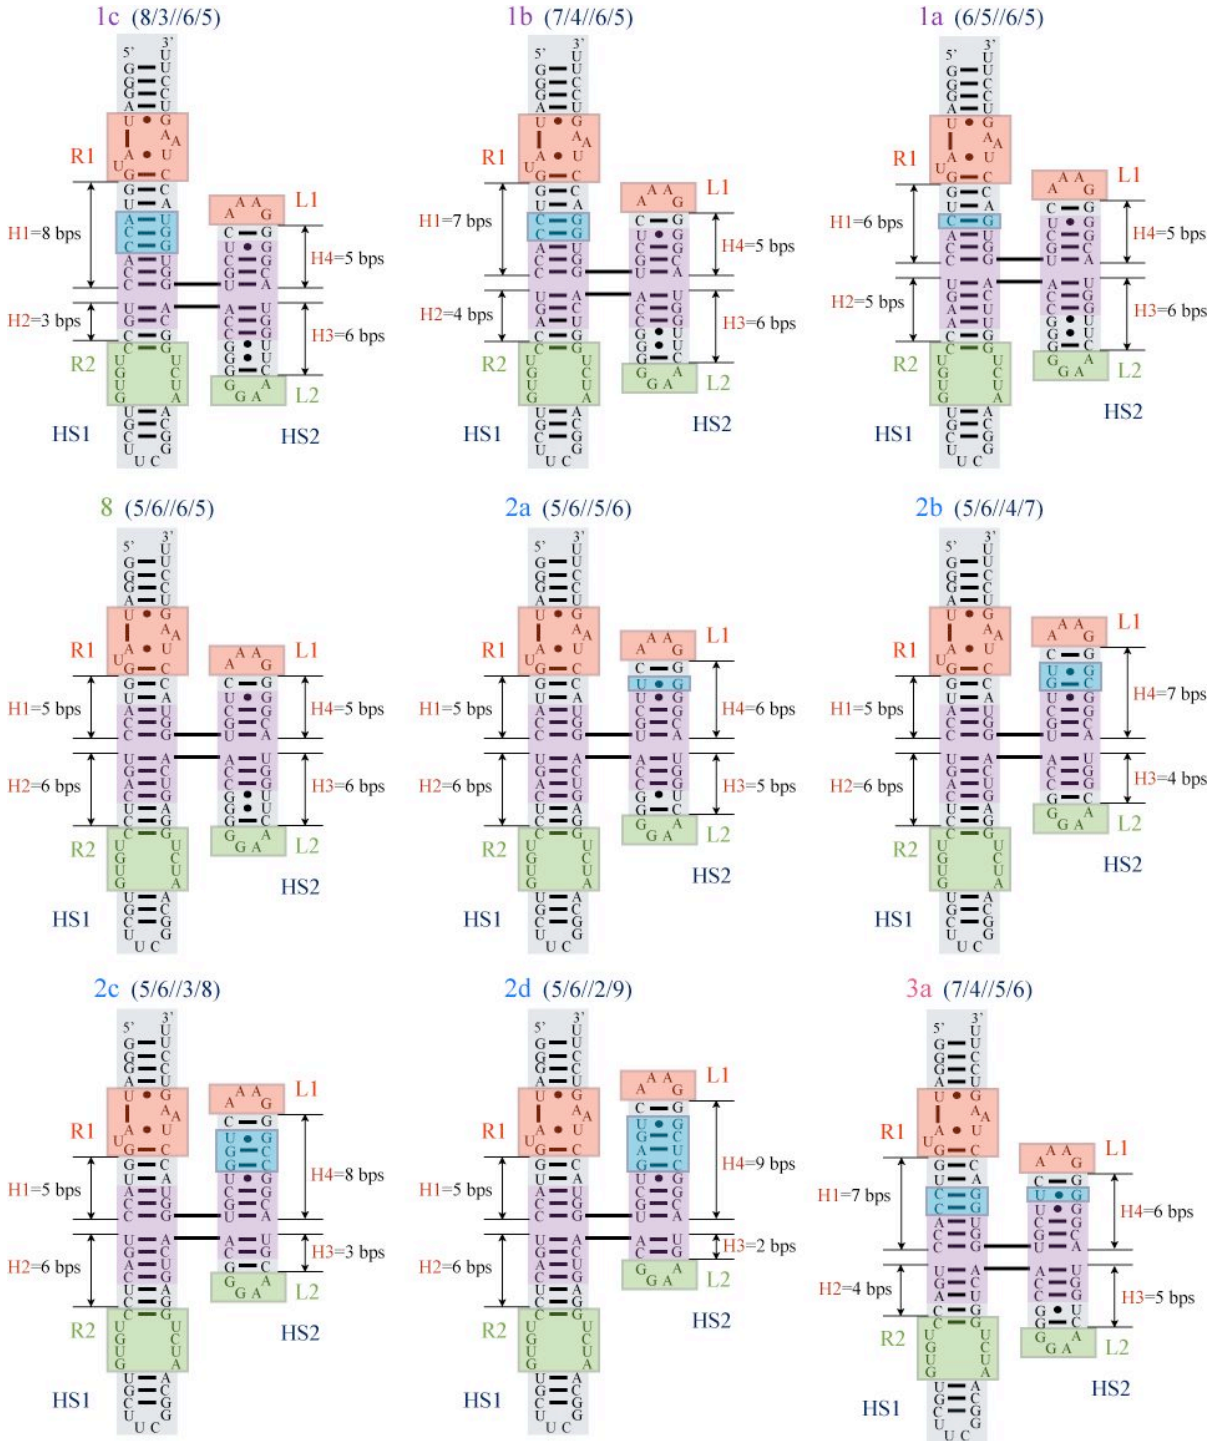

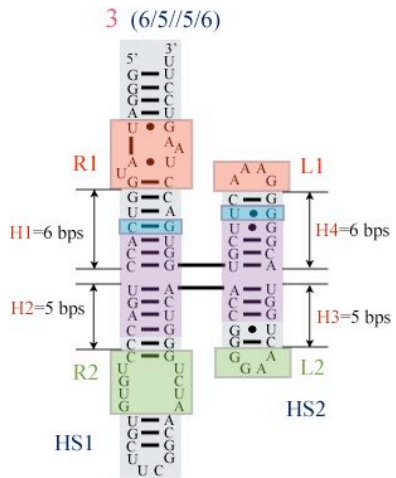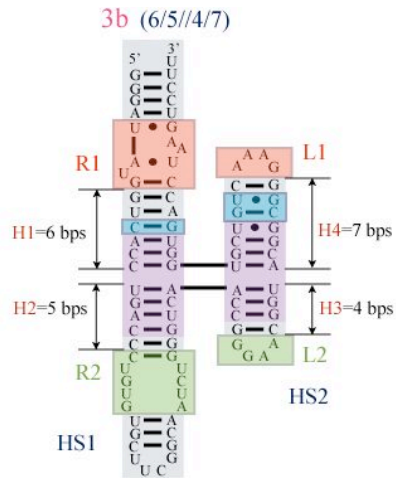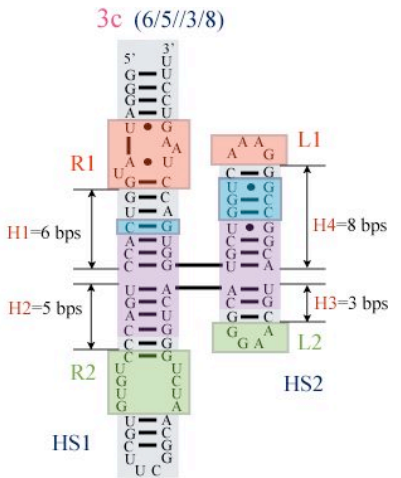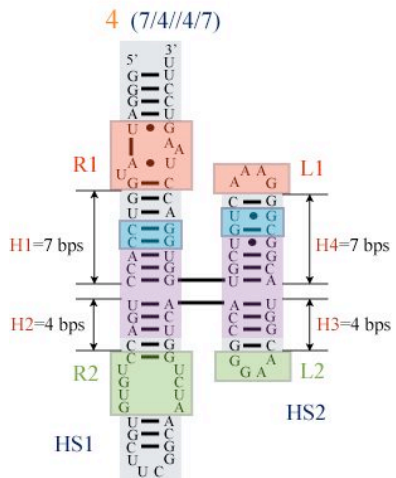

**Figure S-2.** Detailed molecular design of hetero-multimeric systems, **8TA-8TB-8TC** and **1bDA-1bDB** and their mutants. Arrows represent tertiary contacts. RNA mutants such as **1bDBmut**, **8TBmut** and **8TCmut** have receptor regions (R3) that are being rotated by 180° from the original design of **1bDB**, **8TB** and **8TC** (highlighted in yellow).

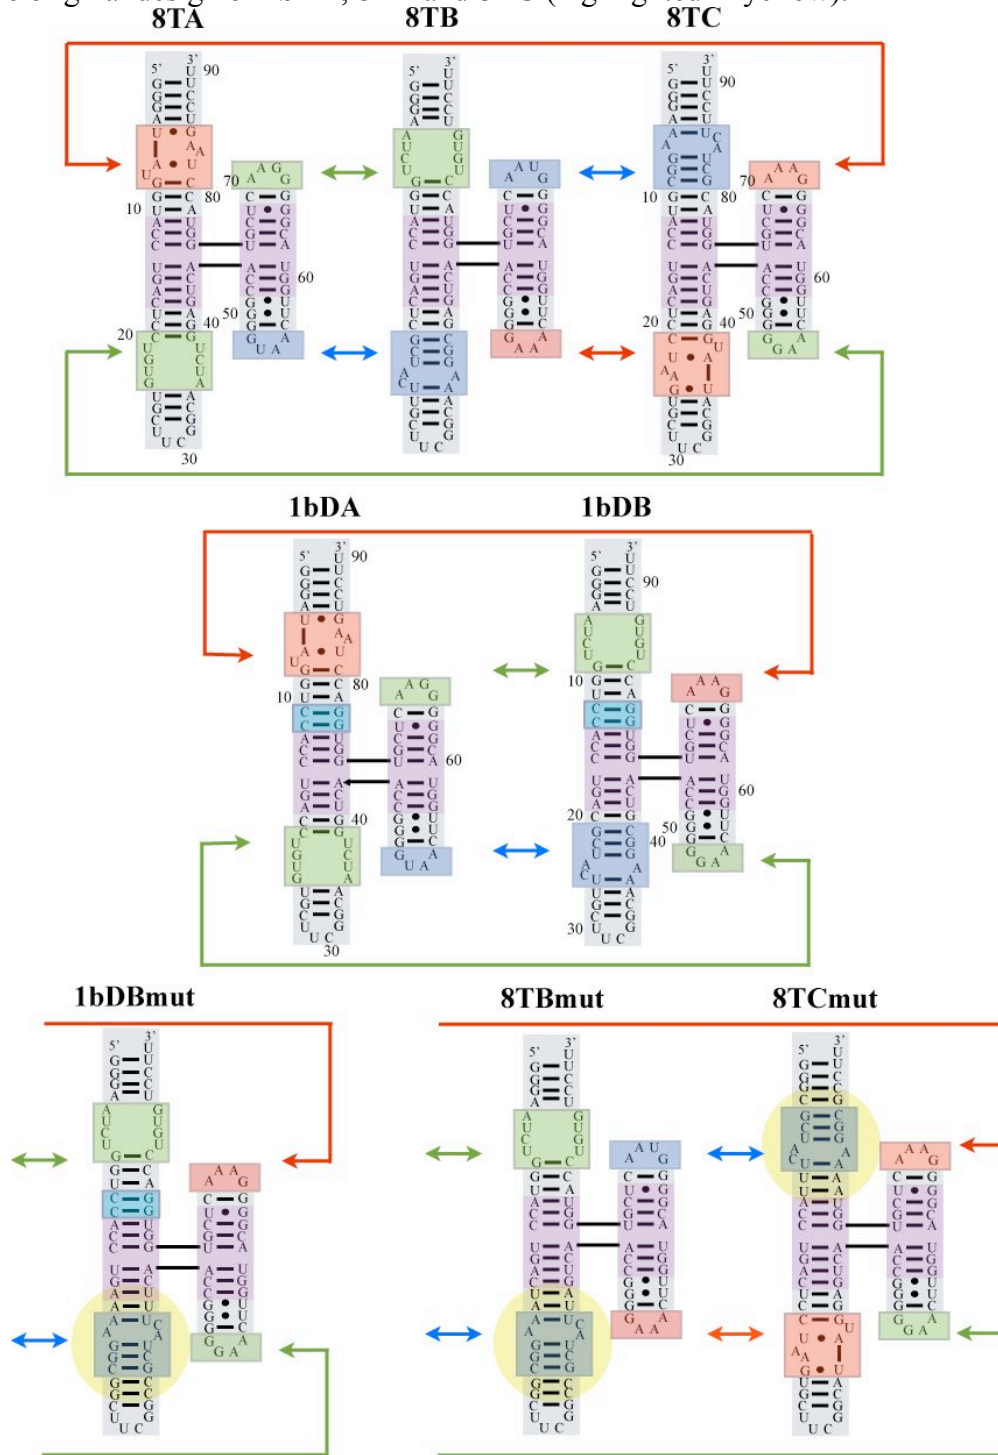



**Figure S-3.** Dilution of pre-assembled molecule **8\*** from 250 nM down to picomolar concentrations. Control RNA - molecule **B** containing the same 4WJ with two GAAA loops and two GAAA-receptors placed on its arms - creates a ladder of multimeric complexes with the dimer as a major product (34).

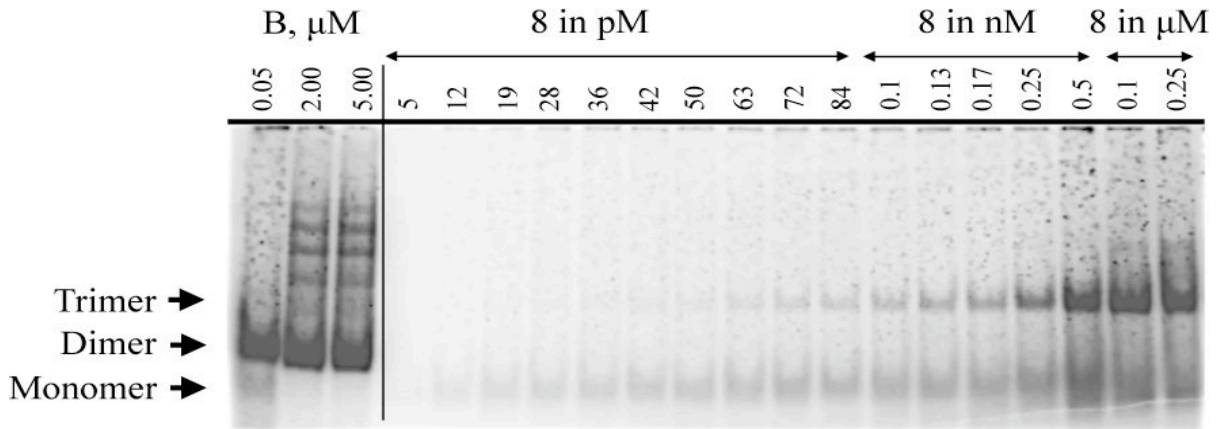

**Figure S-4.** Exchange kinetics of molecule **8** for the incorporation into pre-assembled complexes. A. Representation of the exchange reaction. From the top-view, each monomer can be visualized as two circles connected via 4WJ crossover. Stars correspond to radiolabel. B. Native gel electrophoresis. Unlabeled molecule **8** was pre-assembled at 1  $\mu\text{M}$  concentration at 30°C in the presence of 15 mM magnesium ions by a standard procedure described in 'Materials and Methods' section of this work. After self-assembly, a small amount of radiolabeled **8\*** was added to the mixture and divided into 10  $\mu\text{L}$  aliquots. At certain time intervals, samples were quickly mixed with 10  $\mu\text{L}$  of loading buffer and placed on dry ice. The samples were loaded in reverse order to minimize the experimental error. C. Percentage of trimer versus time. The data was analyzed by nonlinear fitting to a single exponential curve.  $K_{\text{ex}}$  was found from the following equation:  $K_{\text{ex}} = \ln 2 / t(1/2)$ , where  $t(1/2)$  is time in seconds at which 50% of the exchange between the free monomers in solution and the units in the closed complexes occur. A pseudo-first order rate constant ( $K_{\text{ex}}$ ) of  $3.43 \times 10^{-4} \text{ s}^{-1}$ , corresponding to  $t(1/2) = 21 \pm 2 \text{ min}$  ( $1260 \pm 120 \text{ s}$ ) was obtained by fitting the exchange curve.

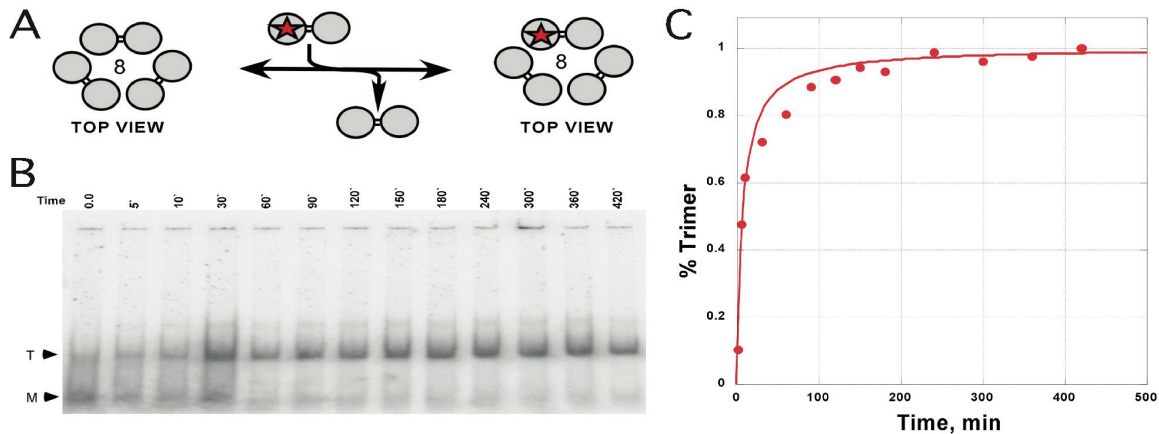

**Figure S-5.** Schematic diagrams of hetero-multimeric complexes derived from molecule **8** to study the stoichiometry of the complex formation. GAAA-receptor/loop motifs are illustrated in red, green indicates GGAA-receptor/loops, and GUAA-receptor/loop interactions are presented in blue. Various loops and receptors are placed in a way to avoid self-assembly of individual units, and the monomer designs were optimized in a way that HS2 of the  $n^{\text{th}}$  subunit is complement to the HS1 interaction interface of the first subunit.

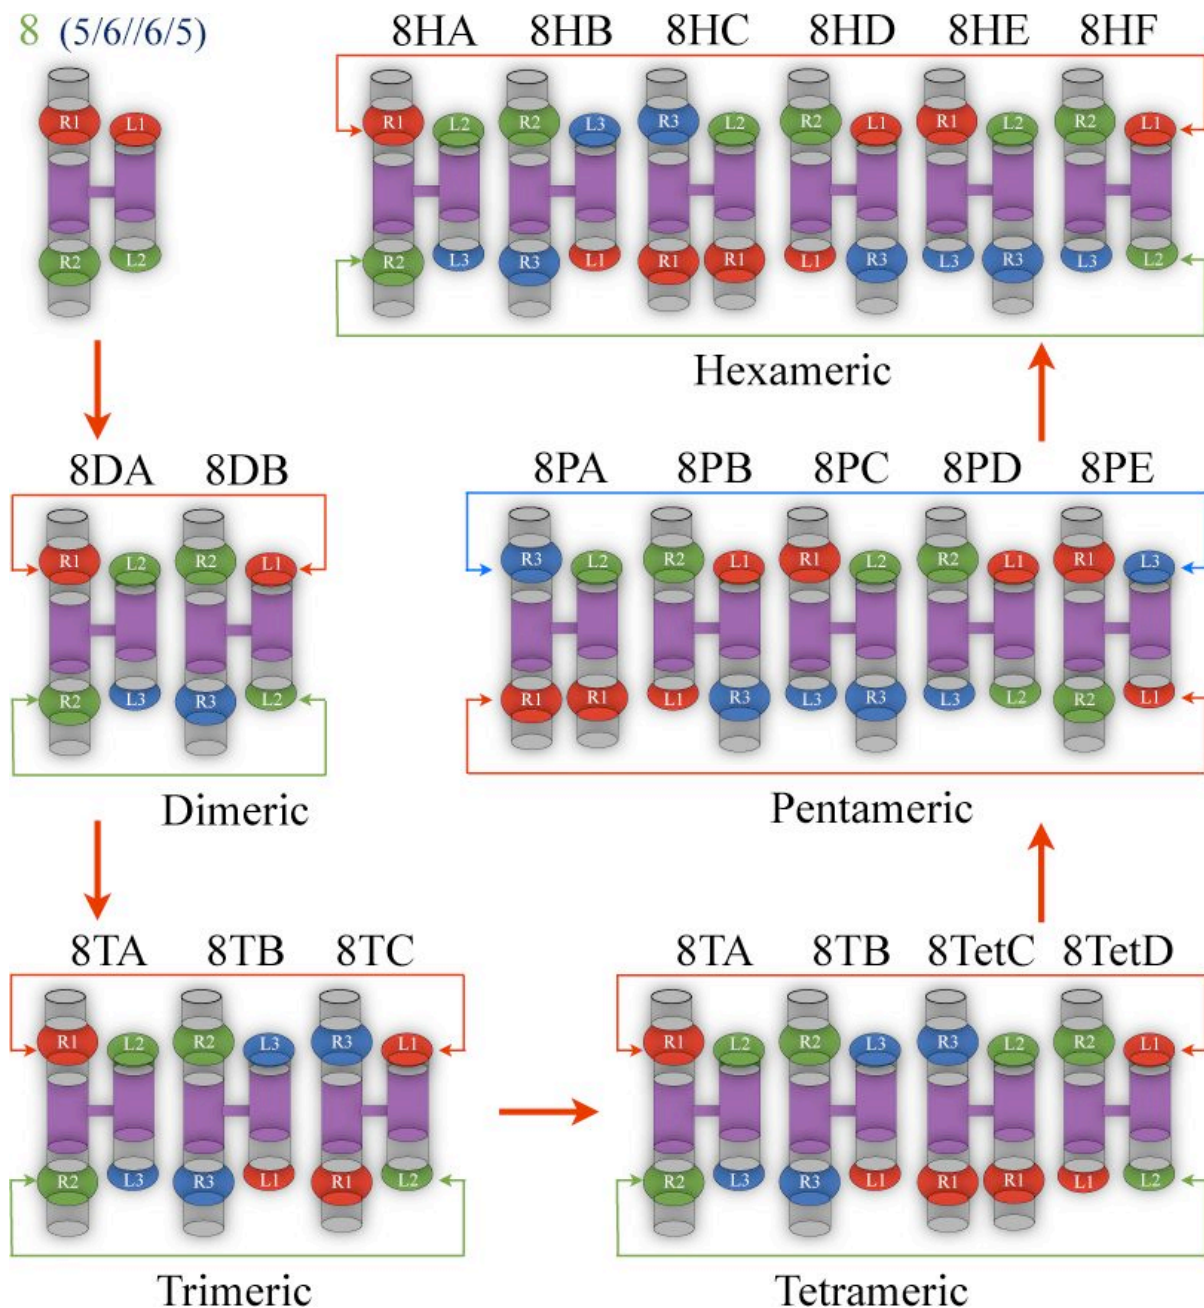



**Figure S-7.** Comparative native gel study between the unmodified heteromultimeric sets with mutant forms. A. Native gel of hetero-assembly between **8TA\*** with **8TBmut** and **8TCmut**. B. Native gel electrophoresis of unmodified hetero-dimeric and -trimeric sets. Detailed sequence information can be found in Figure S2.

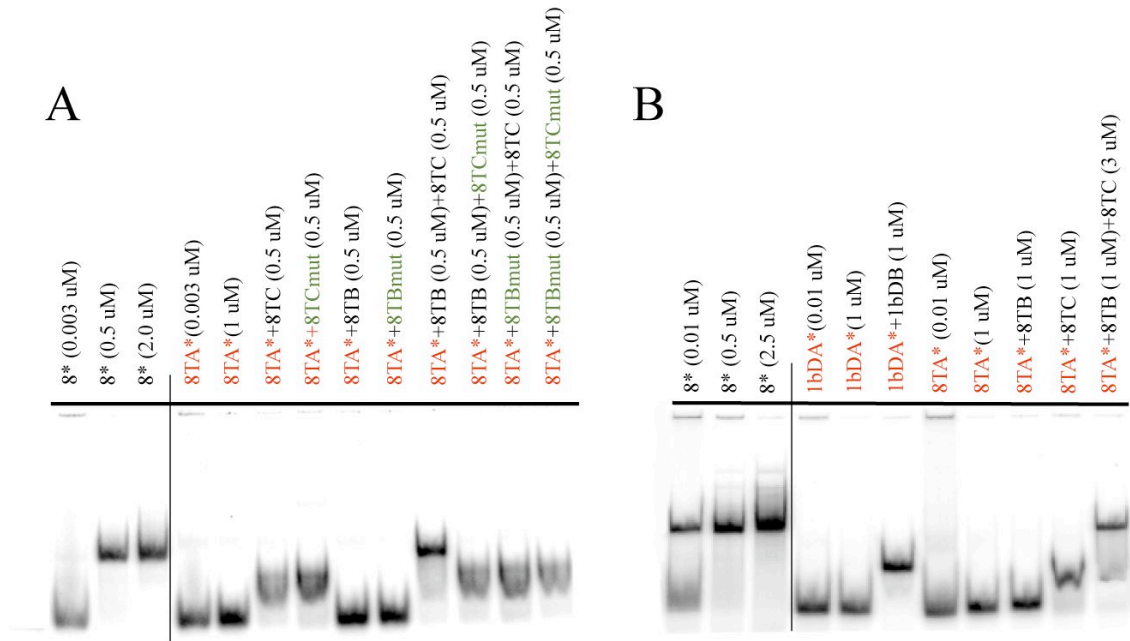

**Figure S-8.** TEM images of molecule **8**, **2a**, **2b**, **2c** and **2d** complexes. RNA assembly was performed as described in Material and Methods section. The final concentration of RNA in each sample is 2.5  $\mu\text{M}$ . A 3  $\mu\text{l}$  volume of RNA sample was placed on carbon-coated grid purchased from Electron Microscopy Sciences ([www.emsdiasum.com](http://www.emsdiasum.com)) for 2 minutes, washed with increasing concentrations of ethanol (from 25% to 100%) and air-dried. Tungsten-shadowing of the sample was carried under high vacuum at  $\sim 30$  mA for a period of 10-15 min. The obtained RNA constructs were visualized on the grid on a Transmission Electron Microscope (TEM JEOL100CX) at the Bowling Green State University EM Center. The white scale bar on each TEM image corresponds to 200 nm.

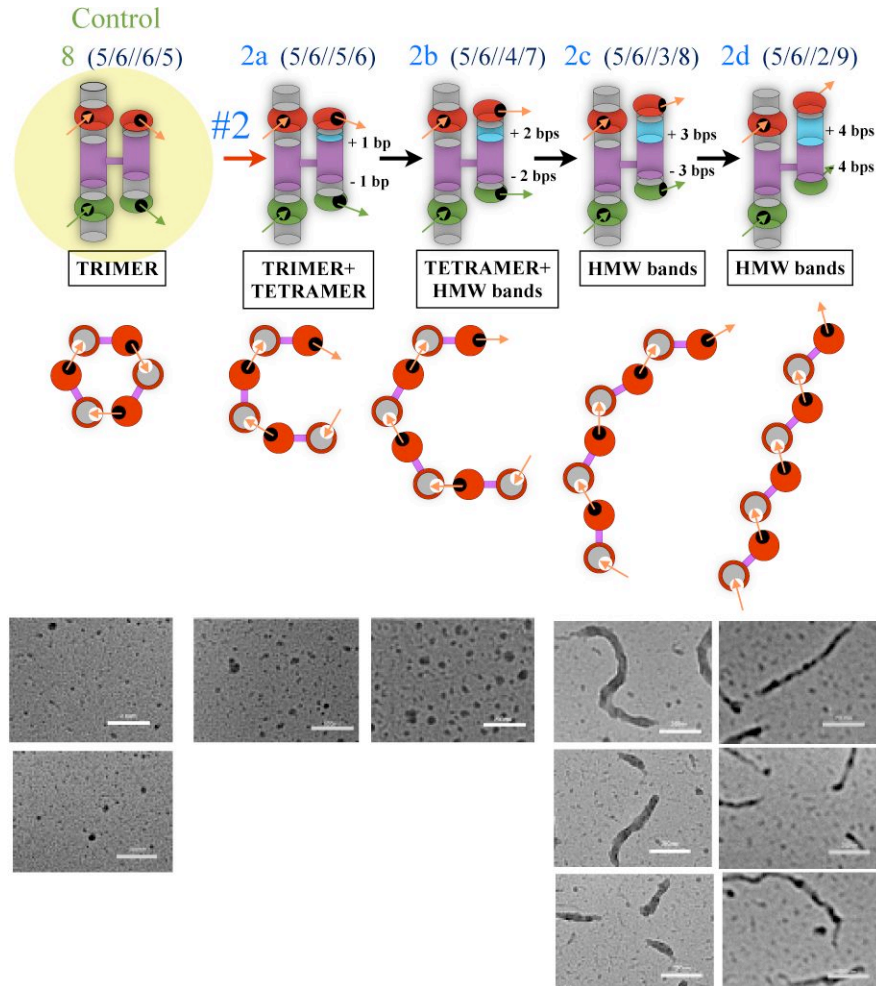



**Figure S-9.** Denaturing gels (8% acrylamide) of **1bDA\*** and **1bDB\*** performed to study lead-induced cleavage in the 20-50 nts regions. The areas of interest such as receptor or loop positions are outlined in dotted squares A. Structure probing of radiolabeled **1bDA\*** in monomer and dimer states. B. Lead-induced cleavage of radiolabeled **1bDB\*** in monomer and dimer states.

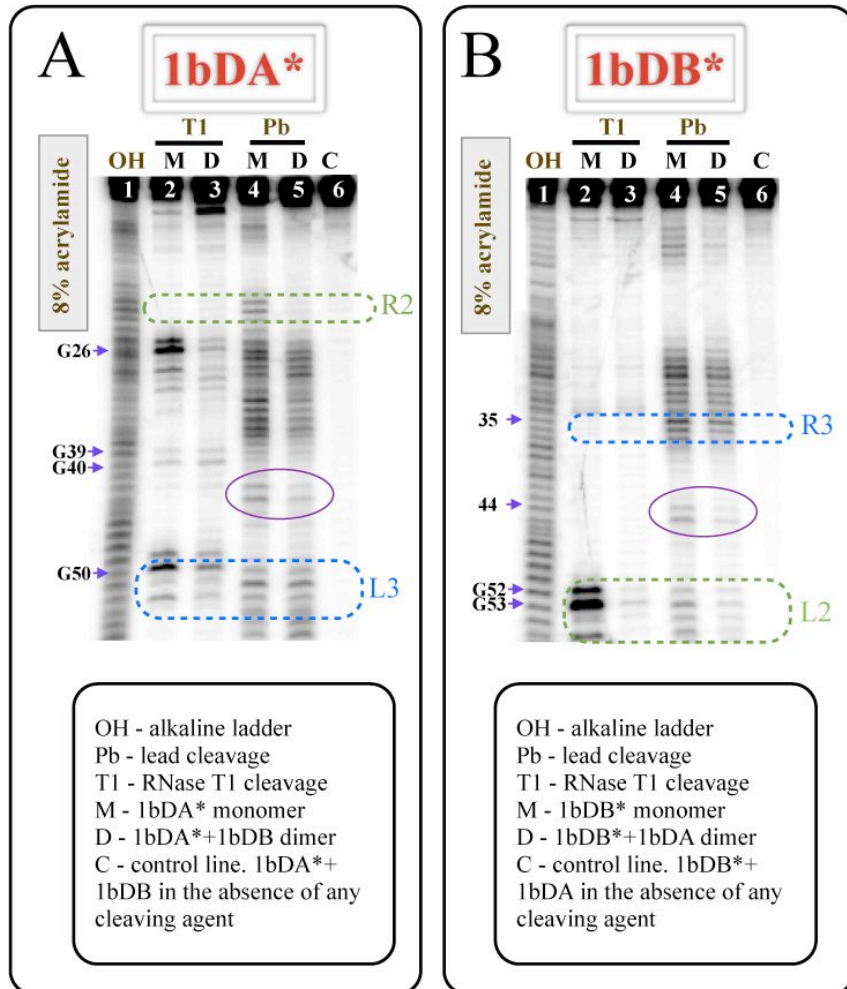

**Figure S-10.** Dissociation constants measurements. The  $K_d$  experiments were performed by titrating a fixed amount of radiolabeled molecule with its partner molecule. In the case of **1b** self-association, fixed amount of **1b\*** was titrated with increasing concentrations of cold **1b**. The same procedure was performed to find  $K_8$  for molecule **8** homo-assembly. Dissociation constants were determined as described above in the Supporting Information and in Materials and Methods of the article.

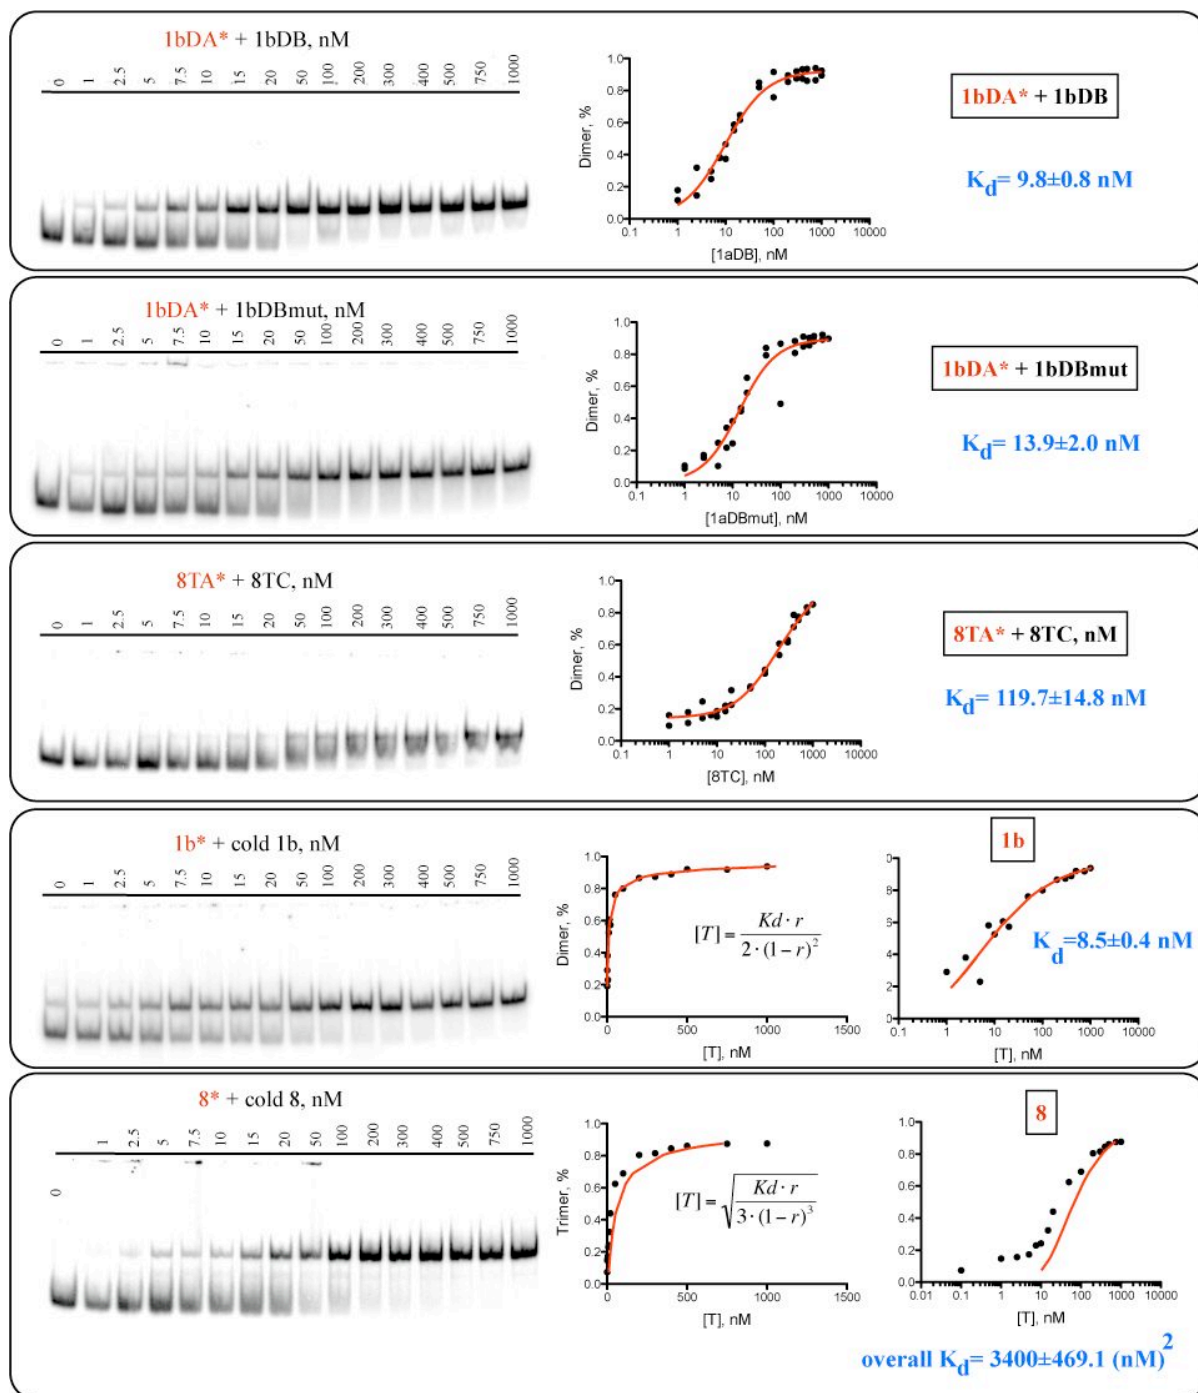

Supplement: supp_gkq1231_Novikova_et_al_SI.pdf [file supp_gkq1231_Novikova_et_al_SI.pdf]
